# Supplementary material for: Comparison of SiO2-supported molybdena, tungsta and rhenia catalysts for olefin metathesis
Source: Royal Society of Chemistry journal article supplement (doi:10.1039/d4cy00730a), 2024-01-01
Supplement: d4cy00730a1.pdf [file d4cy00730a1.pdf]

## Supporting Information

### Comparison of SiO<sub>2</sub>-Supported Molybdena, Tungsta and Rhenia Catalysts

#### for Olefin Metathesis

Bin Zhang, Israel E. Wachs

*Operando* Molecular Spectroscopy and Catalysis Laboratory, Department of Chemical & Biomolecular Engineering,  
Lehigh University, Bethlehem, PA, 18015, United States

Corresponding Author: Prof. Israel E. Wachs, Email: [iew0@lehigh.edu](mailto:iew0@lehigh.edu)

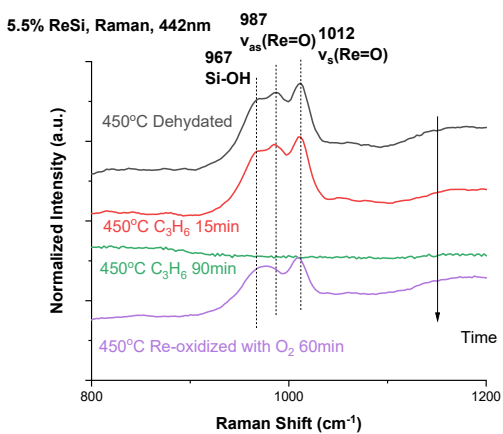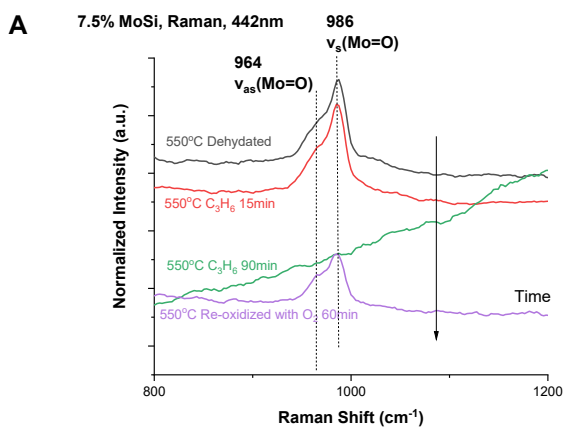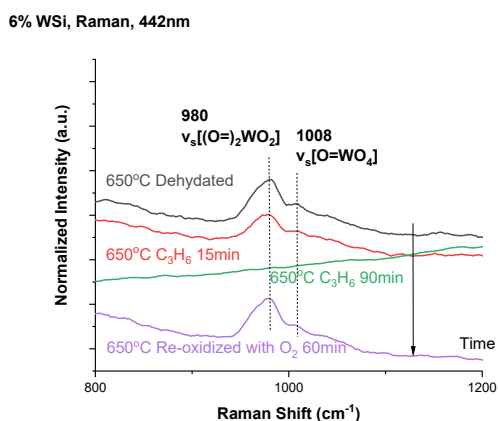

**Figure S1.** *In situ* Raman spectra (800-1200  $\text{cm}^{-1}$ ) of the  $\text{SiO}_2$ -supported metal oxide catalysts after dehydration, propylene activation and re-oxidization conditions: (A)  $\text{ReO}_x/\text{SiO}_2$  at 450  $^\circ\text{C}$ , (B)  $\text{MoO}_x/\text{SiO}_2$  at 550  $^\circ\text{C}$  and (C)  $\text{WO}_x/\text{SiO}_2$  at 650  $^\circ\text{C}$ .

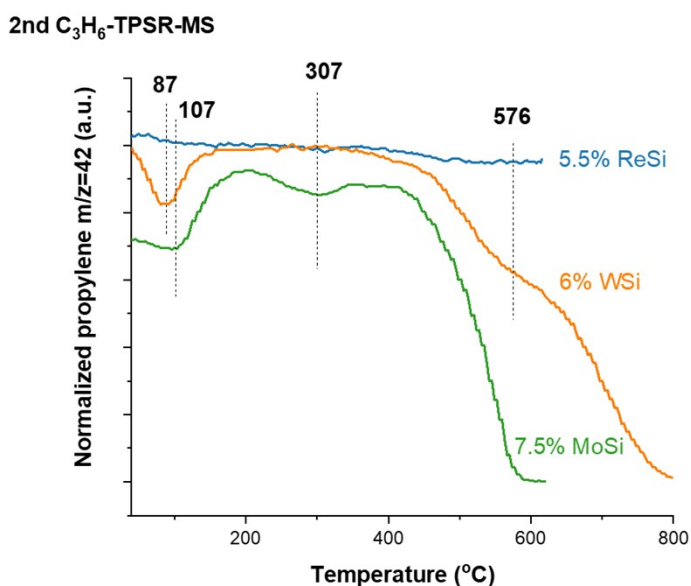

**Figure S2.** The consumption of  $\text{C}_3\text{H}_6$  during the 2<sup>nd</sup>  $\text{C}_3\text{H}_6$ -TPSR-MS (30-600/800  $^\circ\text{C}$ ) cycles with online MS for the  $\text{SiO}_2$ -supported metal oxide catalysts. The MS signals of  $\text{C}_3\text{H}_6$  were normalized against the Ar carrier gas.

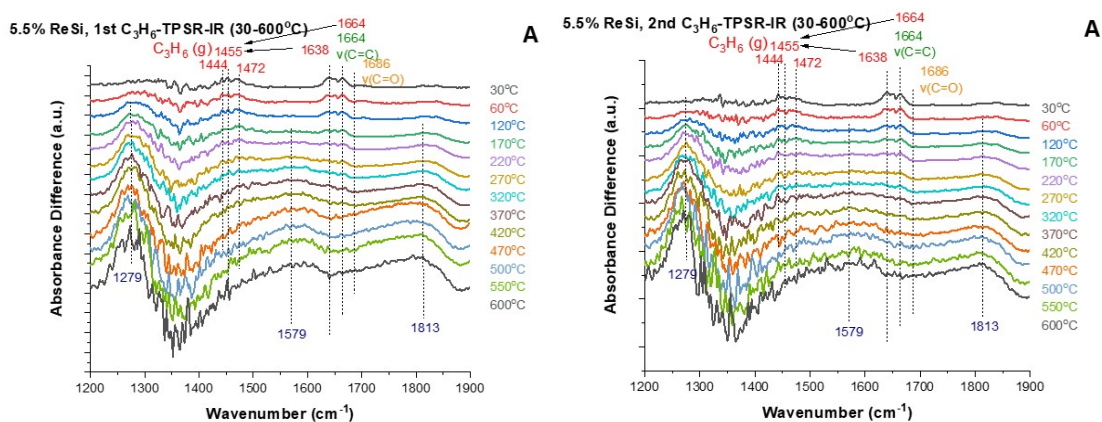

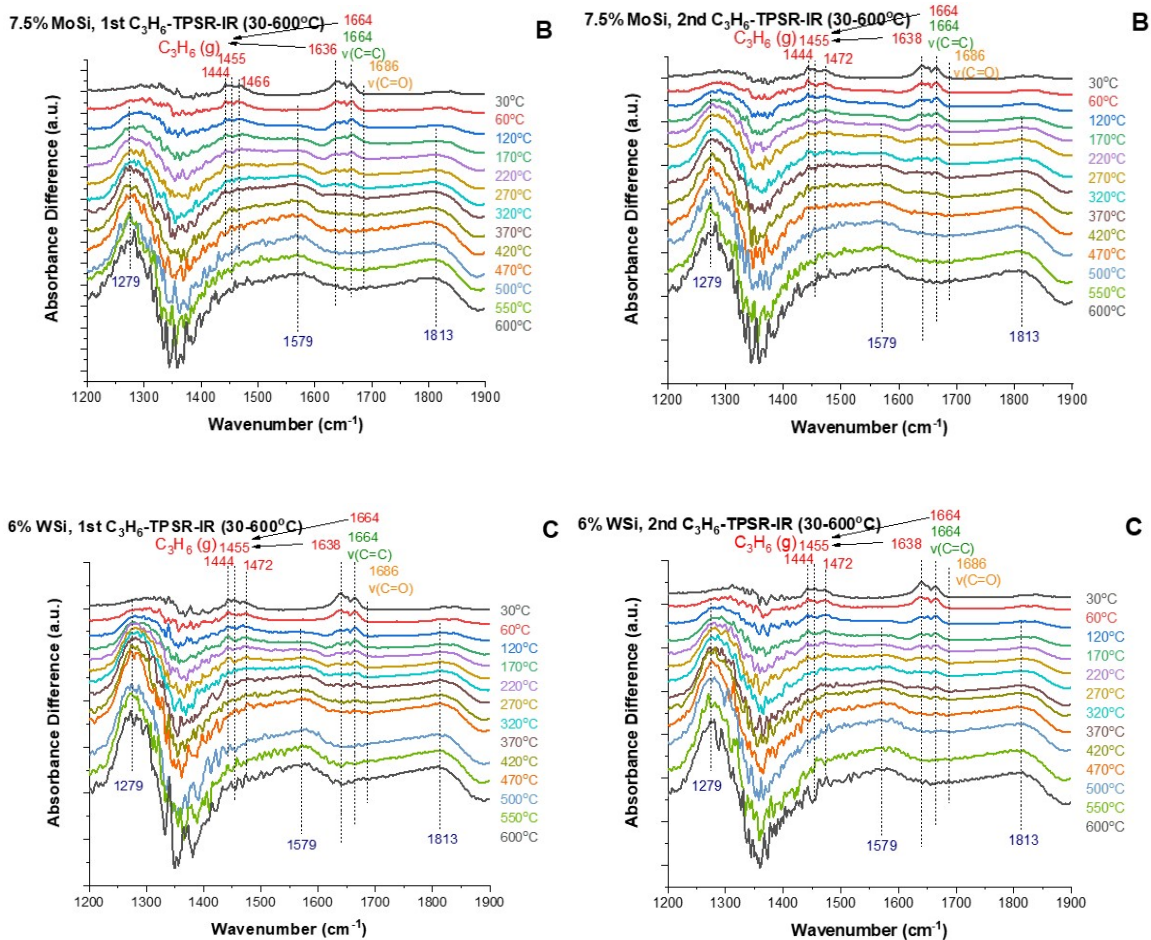

**Figure S3.**  $C_3H_6$ -TPSR-IR (30-600°C) with *in situ* DRIFTS difference spectra of  $SiO_2$  supported metal oxide catalysts. The spectra of dehydrated  $SiO_2$  supported catalysts at 30°C were subtracted from the spectra of catalysts during  $C_3H_6$ -TPSR: (A)  $ReO_x/SiO_2$ , (B)  $MoO_x/SiO_2$ , and (C)  $WO_x/SiO_2$ .

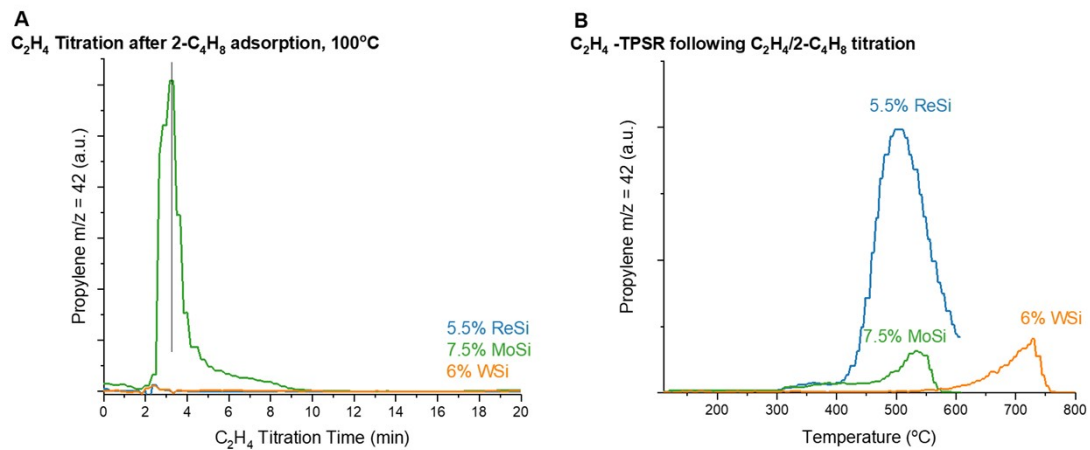

**Figure S4.** Production of  $C_3H_6$  during (A)  $C_2H_4/2-C_4H_8$  titration at 100 °C and (B) subsequent  $C_2H_4$ -TPSR.
